# Supplementary material
Source: Springer Nature journal article supplement (https://www.springermedizin.de/resource/supplementary/12888_2004_100_MOESM2_ESM.pdf/9481842)

% Patients Experiencing AE

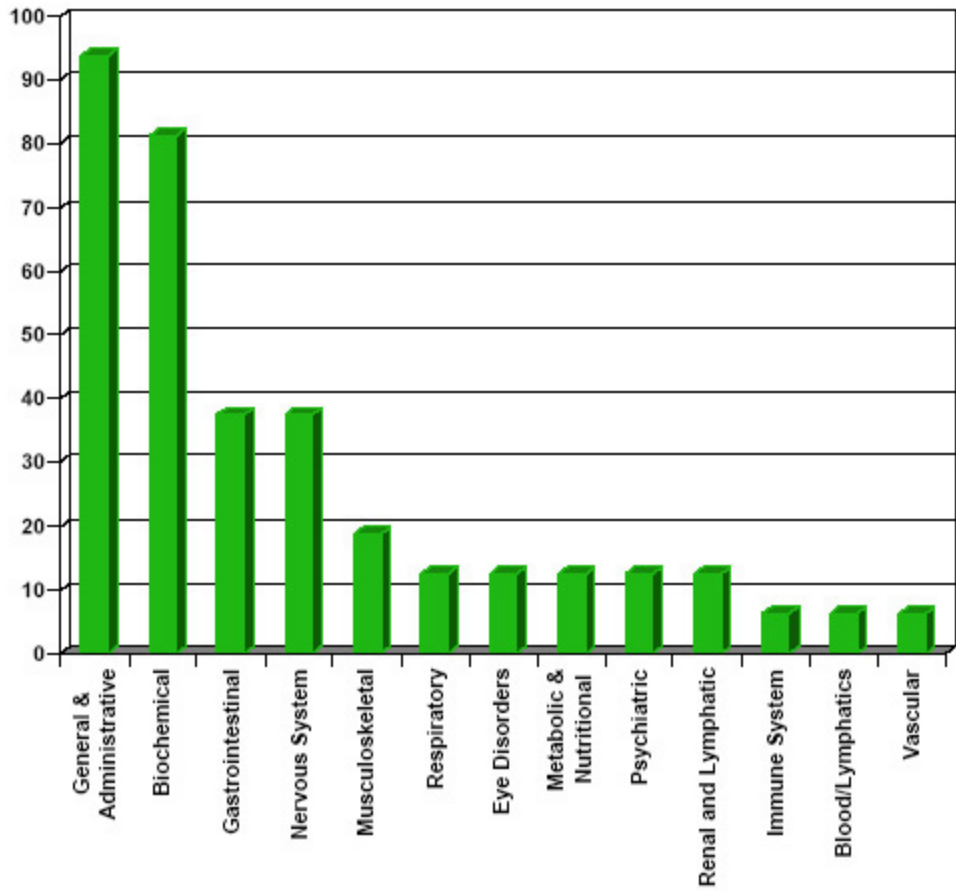

Supplement: MOESM2 [file 9481842]
